# Supplementary material for: Colloidal synthesis of inorganic fullerenenanoparticles and hollow spheres of titanium disulfide
Source: Royal Society of Chemistry journal article supplement (doi:10.1039/c0cc02176h), 2010-09-17
Supplement: c0cc02176h.pdf [file c0cc02176h.pdf]

## Electronic Supplementary Information

# Solution-phase synthesis of IF nanoparticles and hollow spheres of titanium disulfide

5 **Sujay Prabakar, Sean Collins, Bryan Northover and Richard D. Tilley\***

*School of Chemical and Physical Sciences and Macdiarmid Institute of Advanced Materials and Nanotechnology,  
Victoria University of Wellington, New Zealand-600Address.  
E-mail: richard.tilley@vuw.ac.nz*

10

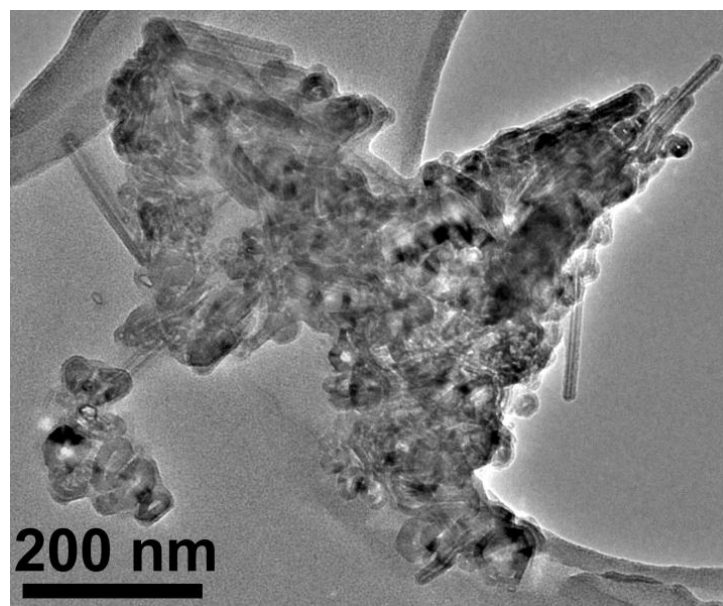

**Figure S1.** Typical low magnification TEM image of IF TiS2 nanoparticles.

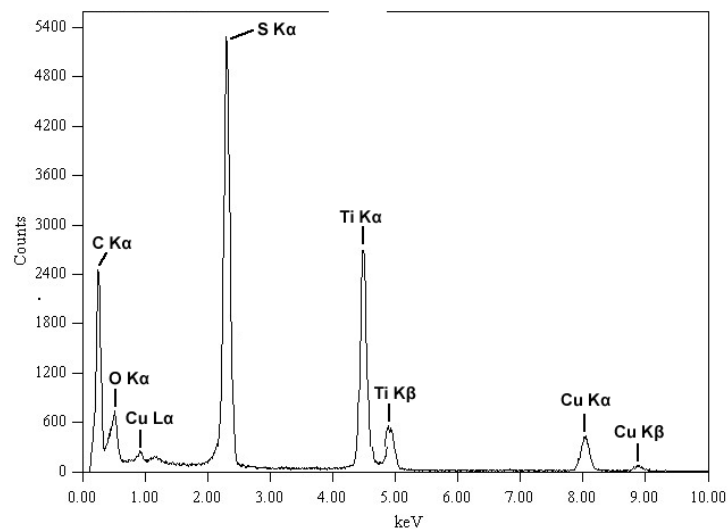

15

**Figure S2.** EDS spectra of IF nanoparticles.
